# Supplementary material
Source: publisher figshare collection journal article supplement (https://acs.figshare.com/ndownloader/files/7833406)
Supplement: Supplementary file 1 [file 7833406]

## Sheet: Ttest significant yAC3021
Table S2. Statistical analysis of the proteins modulated in M phase versus G1 phase for yAC3021 cells. Proteins significantly modulated by T test analysis (Benjamin Hochberg FDR <0.01) are reported. For each protein, protein names, gene names, Uniport ID and intensities values for each group analyzed are reported in the table.
	t-test Significant	PEP	Intensity	-Log t-test p value	T-test q-value	t-test Difference	Protein IDs	Majority protein IDs	Protein names	Gene names	Majority protein IDs
21_M_UP	+	0	65152000000	2.93872	0.00937689	-1.56615	P05318	P05318	60S acidic ribosomal protein P1-alpha	RPP1A	P05318
21_G1_UP	+	2.5098e-31	2066900000	2.94122	0.00934524	1.56658	P53927	P53927	Ribosome biogenesis protein 15	NOP15	P53927
21_M_UP	+	6.0525e-109	74394000000	2.95497	0.0090758	-1.56893	P52489	P52489	Pyruvate kinase 2	PYK2	P52489
21_G1_UP	+	2.4647e-113	2731800000	2.95648	0.00906584	1.56919	P47044	P47044	LOG family protein YJL055W		P47044
21_G1_UP	+	4.6726e-201	2497100000	2.96378	0.00893623	1.57043	Q07623	Q07623	Nucleolar protein 6	NOP6	Q07623
21_M_UP	+	0	97479000000	2.96425	0.00894807	-1.57051	P00924	P00924	Enolase 1	ENO1	P00924
21_M_UP	+	5.0448e-144	7888000000	2.96653	0.00892269	-1.57089	P48606	P48606	Tubulin-specific chaperone A	RBL2	P48606
21_M_UP	+	1.4455e-43	9373100000	2.97084	0.00885591	-1.57162	Q12402	Q12402	Protein YOP1	YOP1	Q12402
21_G1_UP	+	6.3573e-129	918720000	2.97432	0.00880655	1.57221	P53829	P53829	Protein CAF40	CAF40	P53829
21_G1_UP	+	0	5985300000	2.97895	0.00873448	1.57299	P35180	P35180	Mitochondrial import receptor subunit TOM20	TOM20	P35180
21_G1_UP	+	0	23641000000	2.98502	0.00863425	1.57401	P49090	P49090	Asparagine synthetase [glutamine-hydrolyzing] 2	ASN2	P49090
21_M_UP	+	3.1154e-16	553290000	2.99206	0.00851623	-1.57518	Q6Q546	Q6Q546	Ubiquitin-like modifier HUB1	HUB1	Q6Q546
21_G1_UP	+	1.8378e-63	2814900000	3.01375	0.00812112	1.57879	P53043	P53043	Serine/threonine-protein phosphatase T	PPT1	P53043
21_M_UP	+	0	13149000000	3.01609	0.00809739	-1.57917	P10869	P10869	Aspartokinase	HOM3	P10869
21_M_UP	+	2.1928e-21	1594800000	3.01956	0.00805268	-1.57974	O75012	O75012	37S ribosomal protein MRP10, mitochondrial	MRP10	O75012
21_G1_UP	+	5.4879e-157	4746500000	3.01981	0.00806791	1.57979	P46956	P46956	Inorganic phosphate transporter PHO86	PHO86	P46956
21_M_UP	+	1.379e-50	149660000	3.02676	0.00795952	-1.58093	P19880	P19880	AP-1-like transcription factor YAP1	YAP1	P19880
21_M_UP	+	6.6825e-157	3770000000	3.02716	0.00797184	-1.58099	Q02950	Q02950	37S ribosomal protein MRP51, mitochondrial	MRP51	Q02950
21_M_UP	+	1.8886e-80	16672000000	3.03067	0.00792735	-1.58157	O74700	O74700	Mitochondrial import inner membrane translocase subunit TIM9	TIM9	O74700
21_M_UP	+	6.2361e-27	274720000	3.03521	0.00786457	-1.58231	P53968	P53968	Transcriptional regulator CRZ1	CRZ1	P53968
21_M_UP	+	3.8883e-292	2820900000	3.0376	0.00784091	-1.5827	P38996	P38996	Nuclear polyadenylated RNA-binding protein 3	NAB3	P38996
21_M_UP	+	0	31371000000	3.04699	0.00769237	-1.58423	P12695	P12695	Dihydrolipoyllysine-residue acetyltransferase component of pyruvate dehydrogenase complex, mitochondrial	LAT1	P12695
21_G1_UP	+	5.0914e-30	285010000	3.04955	0.00766645	1.58464	Q05027	Q05027	Transcription initiation factor TFIID subunit 9	TAF9	Q05027
21_G1_UP	+	0	12480000000	3.05038	0.00767114	1.58478	P32366	P32366	V-type proton ATPase subunit d	VMA6	P32366
21_G1_UP	+	7.2628e-11	63929000	3.05103	0.00767892	1.58488	P32613	P32613	TRAPP-associated protein TCA17	TCA17	P32613
21_M_UP	+	0	17408000000	3.05399	0.00764603	-1.58536	Q01852	Q01852	Mitochondrial import inner membrane translocase subunit TIM44	TIM44	Q01852
21_G1_UP	+	0	6892100000	3.05492	0.00764908	1.58551	P32895	P32895	Ribose-phosphate pyrophosphokinase 1	PRS1	P32895
21_M_UP	+	1.0998e-115	1636500000	3.06477	0.0074965	-1.5871	P34909	P34909	General negative regulator of transcription subunit 4	MOT2	P34909
21_G1_UP	+	3.2637e-56	4805700000	3.06595	0.00749537	1.58729	P16892	P16892	Mitogen-activated protein kinase FUS3	FUS3	P16892
21_M_UP	+	2.1976e-60	425480000	3.07437	0.00737024	-1.58864	P53947	P53947	Vacuolar membrane protein YNL058C		P53947
21_G1_UP	+	0	14381000000	3.07553	0.00736943	1.58882	P40302	P40302	Proteasome subunit alpha type-6	PRE5	P40302
21_G1_UP	+	0	9769800000	3.07673	0.00736798	1.58902	P32911	P32911	Eukaryotic translation initiation factor eIF-1	SUI1	P32911
21_M_UP	+	4.9575e-179	1153300000	3.07873	0.00735292	-1.58934	P00635	P00635	Repressible acid phosphatase	PHO5	P00635
21_M_UP	+	0	4156400000	3.08004	0.00734986	-1.58954	P16622	P16622	Ferrochelatase, mitochondrial	HEM15	P16622
21_M_UP	+	5.2348e-292	17812000000	3.08891	0.00721993	-1.59095	P32263	P32263	Pyrroline-5-carboxylate reductase	PRO3	P32263
21_G1_UP	+	0	5710900000	3.09526	0.00713352	1.59196	P20436	P20436	DNA-directed RNA polymerases I, II, and III subunit RPABC3	RPB8	P20436
21_G1_UP	+	0	3671700000	3.11441	0.00684367	1.59497	Q06385	Q06385	Vacuolar protein sorting-associated protein 74	VPS74	Q06385
21_M_UP	+	0	55156000000	3.11698	0.00682094	-1.59538	P38013	P38013	Peroxiredoxin type-2	AHP1	P38013
21_M_UP	+	0	8381600000	3.11958	0.00681586	-1.59578	P18759	P18759	Vesicular-fusion protein SEC18	SEC18	P18759
21_M_UP	+	6.8849e-236	63258000000	3.1217	0.00680049	-1.59612	P38427	P38427	Trehalose synthase complex regulatory subunit TSL1	TSL1	P38427
21_M_UP	+	8.5537e-200	1035900000	3.12449	0.00677488	-1.59655	P53128	P53128	Methylenetetrahydrofolate reductase 2	MET13	P53128
21_M_UP	+	5.4105e-22	1645900000	3.13263	0.00666657	-1.59782	O94742	O94742	26S proteasome complex subunit SEM1	SEM1	O94742
21_M_UP	+	0	62145000000	3.13424	0.00665948	-1.59807	P00044;CON__P62894	P00044	Cytochrome c iso-1	CYC1	P00044
21_G1_UP	+	1.6373e-06	131260000	3.1427	0.00654852	1.59937	P40206	P40206	Protein JLP2	JLP2	P40206
21_G1_UP	+	4.9286e-86	3400400000	3.15181	0.00642961	1.60078	Q99216	Q99216	Pre-rRNA-processing protein PNO1	PNO1	Q99216
21_G1_UP	+	0	24952000000	3.15277	0.00643251	1.60092	P20459	P20459	Eukaryotic translation initiation factor 2 subunit alpha	SUI2	P20459
21_G1_UP	+	5.2145e-07	37803000	3.15528	0.00641265	1.60131	Q12359	Q12359	Ammonia transport outward protein 3	ATO3	Q12359
21_G1_UP	+	2.9414e-15	453320000	3.15634	0.00641425	1.60147	P53835	P53835	Plasma membrane fusion protein PRM1	PRM1	P53835
21_M_UP	+	0	18438000000	3.15705	0.00642103	-1.60158	P38988	P38988	Mitochondrial GTP/GDP carrier protein 1	GGC1	P38988
21_M_UP	+	1.7739e-19	1525700000	3.15972	0.0063989	-1.60199	P36053	P36053	Transcription elongation factor 1	ELF1	P36053
21_M_UP	+	9.086e-133	1196000000	3.1717	0.00624168	-1.60381	P39523	P39523	Uncharacterized protein YMR124W		P39523
21_M_UP	+	2.7745e-117	1459900000	3.17647	0.00619031	-1.60454	Q05518	Q05518	Protein PAL1	PAL1	Q05518
21_M_UP	+	0	16302000000	3.18174	0.0061323	-1.60534	P33297	P33297	26S protease regulatory subunit 6A	RPT5	P33297
21_G1_UP	+	2.6375e-126	4204100000	3.18512	0.00610134	1.60585	Q04493	Q04493	Prefoldin subunit 5	GIM5	Q04493
21_G1_UP	+	0	11862000000	3.19698	0.00595319	1.60763	P25293	P25293	Nucleosome assembly protein	NAP1	P25293
21_M_UP	+	4.4219e-167	2260700000	3.19747	0.00596286	-1.60771	Q08199	Q08199	Nucleotide exchange factor SIL1	SIL1	Q08199
21_G1_UP	+	0	6449500000	3.19878	0.00596126	1.6079	P33767	P33767	Dolichyl-diphosphooligosaccharide--protein glycosyltransferase subunit WBP1	WBP1	P33767
21_G1_UP	+	8.6517e-213	1712000000	3.20169	0.00593784	1.60834	P39721	P39721	Protein AIM2	AIM2	P39721
21_M_UP	+	2.7544e-204	4281200000	3.2068	0.00588466	-1.6091	Q02204	Q02204	54S ribosomal protein L13, mitochondrial	MRPL13	Q02204
21_M_UP	+	7.7336e-245	32806000000	3.21124	0.00584101	-1.60976	P38248	P38248	Cell wall protein ECM33	ECM33	P38248
21_G1_UP	+	1.3511e-271	2851000000	3.21302	0.00583322	1.61003	P10962	P10962	Protein MAK16	MAK16	P10962
21_G1_UP	+	5.3595e-53	354110000	3.2163	0.00580555	1.61052	Q04307	Q04307	DNA-directed RNA polymerase III subunit RPC10	RPC11	Q04307
21_G1_UP	+	2.8951e-267	1829300000	3.23102	0.00562778	1.61269	P25303	P25303	DnaJ-related protein SCJ1	SCJ1	P25303
21_M_UP	+	6.5472e-243	4115300000	3.23141	0.00563851	-1.61275	Q12513	Q12513	Translation machinery-associated protein 17	TMA17	Q12513
21_M_UP	+	1.4055e-66	541940000	3.23594	0.0055957	-1.61342	P38339	P38339	RHO GTPase-activating protein RGD1	RGD1	P38339
21_G1_UP	+	0	10543000000	3.23851	0.00557848	1.6138	Q03862	Q03862	Probable metalloprotease ARX1	ARX1	Q03862
21_M_UP	+	1.1954e-105	2286000000	3.24103	0.00556192	-1.61417	Q00816	Q00816	Resistance to glucose repression protein 1	REG1	Q00816
21_M_UP	+	0	61541000000	3.24801	0.00548873	-1.61519	P40215	P40215	External NADH-ubiquinone oxidoreductase 1, mitochondrial	NDE1	P40215
21_M_UP	+	0	44463000000	3.26574	0.00528426	-1.61777	P17709	P17709	Glucokinase-1	GLK1	P17709
21_G1_UP	+	1.0328e-227	25924000000	3.26907	0.00525876	1.61825	P14120	P14120	60S ribosomal protein L30	RPL30	P14120
21_M_UP	+	1.6712e-158	3758500000	3.27005	0.00526202	-1.61839	P48837	P48837	Nucleoporin NUP57	NUP57	P48837
21_M_UP	+	1.659e-45	521430000	3.27816	0.0051795	-1.61956	Q05812	Q05812	Meiotic sister-chromatid recombination protein 3	MSC3	Q05812
21_M_UP	+	1.1185e-45	713450000	3.2835	0.00513088	-1.62033	Q12296	Q12296	Protein MAM3	MAM3	Q12296
21_M_UP	+	9.16e-119	4451700000	3.28352	0.00514554	-1.62033	P39105	P39105	Lysophospholipase 1	PLB1	P39105
21_G1_UP	+	1.7715e-14	505710000	3.30299	0.00493418	1.62311	Q06991	Q06991	Protein PUN1	PUN1	Q06991
21_G1_UP	+	1.596e-297	7133100000	3.30323	0.00494584	1.62314	P05743	P05743	60S ribosomal protein L26-A	RPL26A	P05743
21_G1_UP	+	0	190310000000	3.31791	0.00479536	1.62522	P25443	P25443	40S ribosomal protein S2	RPS2	P25443
21_M_UP	+	0	23972000000	3.32563	0.00472464	-1.6263	P25719	P25719	Peptidyl-prolyl cis-trans isomerase C, mitochondrial	CPR3	P25719
21_M_UP	+	7.1168e-178	1291600000	3.32721	0.00472134	-1.62652	P49095	P49095	Glycine dehydrogenase [decarboxylating], mitochondrial	GCV2	P49095
21_M_UP	+	0	45448000000	3.33782	0.00462094	-1.62801	Q12118	Q12118	Small glutamine-rich tetratricopeptide repeat-containing protein 2	SGT2	Q12118
21_M_UP	+	1.2123e-214	1788800000	3.33989	0.00461248	-1.6283	Q04182	Q04182	ATP-dependent permease PDR15	PDR15	Q04182
21_M_UP	+	0	75918000000	3.34285	0.00459476	-1.62871	P17505	P17505	Malate dehydrogenase, mitochondrial	MDH1	P17505
21_M_UP	+	0	47975000000	3.3442	0.00459403	-1.6289	P09457	P09457	ATP synthase subunit 5, mitochondrial	ATP5	P09457
21_G1_UP	+	8.4232e-25	319070000	3.34655	0.00458285	1.62922	P36144	P36144	Ribosome biogenesis protein UTP30	UTP30	P36144
21_M_UP	+	0	9424100000	3.34969	0.00456341	-1.62966	P32558	P32558	FACT complex subunit SPT16	SPT16	P32558
21_G1_UP	+	2.9008e-25	1849300000	3.37482	0.00431974	1.63312	P40078	P40078	Ribosome biogenesis protein NSA2	NSA2	P40078
21_G1_UP	+	0	564200000	3.38136	0.00426796	1.63401	P23595	P23595	Serine/threonine-protein phosphatase PP2A-2 catalytic subunit	PPH22	P23595
21_G1_UP	+	0	10325000000	3.3815	0.00427944	1.63403	P20447	P20447	ATP-dependent RNA helicase DBP3	DBP3	P20447
21_M_UP	+	7.8565e-73	1032600000	3.38251	0.00428241	-1.63417	Q06336	Q06336	ADP-ribosylation factor-binding protein GGA1	GGA1	Q06336
21_G1_UP	+	0	72441000000	3.38418	0.00427894	1.6344	P00817	P00817	Inorganic pyrophosphatase	IPP1	P00817
21_M_UP	+	9.1461e-148	806900000	3.38802	0.00425416	-1.63492	P39927	P39927	Protein PTI1	PTI1	P39927
21_M_UP	+	1.1046e-45	1047700000	3.39027	0.00424501	-1.63523	P25296	P25296	Calcineurin subunit B	CNB1	P25296
21_G1_UP	+	9.2357e-78	768890000	3.39211	0.00424001	1.63548	P15367	P15367	Signal peptidase complex catalytic subunit SEC11	SEC11	P15367
21_M_UP	+	1.0424e-28	211440000	3.40035	0.00417314	-1.63659	Q99176	Q99176	Protein SRN2	SRN2	Q99176
21_M_UP	+	0	11524000000	3.40552	0.00413636	-1.63729	Q08723	Q08723	26S proteasome regulatory subunit RPN8	RPN8	Q08723
21_G1_UP	+	3.4072e-288	3906900000	3.40603	0.00414434	1.63736	Q07505	Q07505	Putative carboxymethylenebutenolidase	YDL086W	Q07505
21_G1_UP	+	0	33270000000	3.41154	0.00410473	1.6381	P33442	P33442	40S ribosomal protein S1-A	RPS1A	P33442
21_M_UP	+	0	18203000000	3.41305	0.00410316	-1.6383	P32565	P32565	26S proteasome regulatory subunit RPN2	RPN2	P32565
21_M_UP	+	1.7737e-168	4559800000	3.42056	0.00404544	-1.63931	P07253	P07253	Cytochrome B pre-mRNA-processing protein 6	CBP6	P07253
21_G1_UP	+	8.4909e-18	442610000	3.43211	0.00395155	1.64085	P31109	P31109	Synaptobrevin homolog 1	SNC1	P31109
21_M_UP	+	1.9181e-42	1166400000	3.44483	0.00384947	-1.64253	P35817	P35817	Bromodomain-containing factor 1	BDF1	P35817
21_G1_UP	+	0	15681000000	3.44664	0.00384556	1.64277	P50095	P50095	Inosine-5-monophosphate dehydrogenase 3	IMD3	P50095
21_M_UP	+	0	3713900000	3.45359	0.00379647	-1.64369	P32568	P32568	Protein SNQ2	SNQ2	P32568
21_M_UP	+	0	24632000000	3.45464	0.00379923	-1.64382	P47075	P47075	Vacuolar transporter chaperone 4	VTC4	P47075
21_M_UP	+	0	12902000000	3.45606	0.0037989	-1.64401	P47068	P47068	Myosin tail region-interacting protein MTI1	BBC1	P47068
21_M_UP	+	2.7658e-70	1293700000	3.46889	0.00370001	-1.64569	Q02630	Q02630	Nucleoporin NUP116/NSP116	NUP116	Q02630
21_G1_UP	+	2.1998e-49	2429800000	3.4696	0.00370576	1.64578	P43639	P43639	Casein kinase II subunit beta	CKB1	P43639
21_M_UP	+	0	17774000000	3.47058	0.00370927	-1.64591	P41811	P41811	Coatomer subunit beta	SEC27	P41811
21_G1_UP	+	0	6765000000	3.47885	0.00365106	1.64698	P53295	P53295	Ribosome-interacting GTPase 2	RBG2	P53295
21_M_UP	+	3.6685e-193	1502100000	3.48271	0.0036304	-1.64748	P25379	P25379	Catabolic L-serine/threonine dehydratase;L-serine dehydratase;L-threonine dehydratase	CHA1	P25379
21_M_UP	+	0	30688000000	3.48696	0.00360668	-1.64803	P39077	P39077	T-complex protein 1 subunit gamma	CCT3	P39077
21_M_UP	+	8.4008e-262	2768900000	3.49135	0.00358196	-1.6486	P32486	P32486	Beta-glucan synthesis-associated protein KRE6	KRE6	P32486
21_G1_UP	+	5.8498e-96	1080300000	3.50058	0.00351813	1.64979	P38801	P38801	Exosome complex protein LRP1	LRP1	P38801
21_G1_UP	+	3.541e-21	268780000	3.50535	0.00349104	1.6504	Q12196	Q12196	Serine/threonine-protein kinase RIO1	RIO1	Q12196
21_G1_UP	+	6.3036e-229	2522100000	3.50977	0.00346706	1.65096	P20434	P20434	DNA-directed RNA polymerases I, II, and III subunit RPABC1	RPB5	P20434
21_M_UP	+	0	13987000000	3.51139	0.00346544	-1.65117	Q07551	Q07551	NADPH-dependent alpha-keto amide reductase		Q07551
21_M_UP	+	2.7068e-180	4482300000	3.51217	0.00347066	-1.65127	P32790	P32790	Actin cytoskeleton-regulatory complex protein SLA1	SLA1	P32790
21_M_UP	+	6.5338e-25	375240000	3.51636	0.00344875	-1.6518	P35725	P35725	Uncharacterized protein YKL063C		P35725
21_G1_UP	+	0	36331000000	3.52818	0.00336728	1.65331	Q03048	Q03048	Cofilin	COF1	Q03048
21_G1_UP	+	1.4375e-135	2838700000	3.52886	0.00337323	1.65339	P35178	P35178	Ribosomal RNA-processing protein 1	RRP1	P35178
21_G1_UP	+	0	18379000000	3.53691	0.00332237	1.65441	Q12109	Q12109	Tryptophan--tRNA ligase, cytoplasmic	WRS1	Q12109
21_G1_UP	+	6.6456e-40	475740000	3.53812	0.00332419	1.65456	P35182	P35182	Protein phosphatase 2C homolog 1	PTC1	P35182
21_M_UP	+	0	32919000000	3.5401	0.00332022	-1.65481	P00128	P00128	Cytochrome b-c1 complex subunit 7	QCR7	P00128
21_G1_UP	+	0	49397000000	3.54371	0.00330387	1.65526	P41338	P41338	Acetyl-CoA acetyltransferase	ERG10	P41338
21_G1_UP	+	0	24340000000	3.55211	0.00325155	1.65631	P15303	P15303	Protein transport protein SEC23	SEC23	P15303
21_M_UP	+	1.1138e-52	996290000	3.55211	0.00326261	-1.65631	Q12355	Q12355	Cell wall mannoprotein PST1	PST1	Q12355
21_G1_UP	+	2.1245e-34	935550000	3.55971	0.00321696	1.65726	P28625	P28625	Protein YIM1	YIM1	P28625
21_G1_UP	+	0	13548000000	3.56128	0.00321631	1.65746	P17076	P17076	60S ribosomal protein L8-A	RPL8A	P17076
21_M_UP	+	0	12059000000	3.56473	0.00320188	-1.65789	Q06440	Q06440	Coronin-like protein	CRN1	Q06440
21_G1_UP	+	0	6145600000	3.57678	0.00312501	1.65938	P30657	P30657	Proteasome subunit beta type-7	PRE4	P30657
21_G1_UP	+	8.7038e-23	363140000	3.57708	0.00313361	1.65942	P33412	P33412	Ethanolamine-phosphate cytidylyltransferase	ECT1	P33412
21_G1_UP	+	7.5033e-75	1454300000	3.58247	0.00310576	1.66008	P40956	P40956	Protein GTS1	GTS1	P40956
21_G1_UP	+	0	15163000000	3.58369	0.00310777	1.66023	Q04894	Q04894	NADP-dependent alcohol dehydrogenase 6	ADH6	Q04894
21_M_UP	+	7.1995e-33	2041600000	3.5858	0.00310356	-1.66049	P38771	P38771	Ribosome-recycling factor, mitochondrial	RRF1	P38771
21_G1_UP	+	1.0495e-128	5726500000	3.5861	0.00311229	1.66053	P32787	P32787	Mitochondrial genome maintenance protein MGM101	MGM101	P32787
21_G1_UP	+	0	2562500000	3.58628	0.003122	1.66055	Q04951	Q04951	Probable family 17 glucosidase SCW10	SCW10	Q04951
21_G1_UP	+	5.1132e-48	567320000	3.58849	0.0031171	1.66082	P40481	P40481	Histidine protein methyltransferase 1	HPM1	P40481
21_G1_UP	+	8.4132e-264	2139800000	3.59661	0.00307021	1.66181	Q08225	Q08225	Probable dipeptidyl peptidase 3		Q08225
21_G1_UP	+	2.2348e-205	26220000000	3.59734	0.00307595	1.6619	P39990	P39990	13 kDa ribonucleoprotein-associated protein	SNU13	P39990
21_G1_UP	+	0	109670000000	3.6049	0.00303366	1.66282	P39516	P39516	40S ribosomal protein S14-B	RPS14B	P39516
21_M_UP	+	3.051e-141	2953400000	3.60774	0.0030247	-1.66317	P38199	P38199	Heterogeneous nuclear rnp K-like protein 2	HEK2	P38199
21_M_UP	+	1.0393e-286	5609100000	3.61013	0.00301891	-1.66346	Q99287	Q99287	Protein SEY1	SEY1	Q99287
21_M_UP	+	2.5453e-35	2763900000	3.61081	0.0030251	-1.66354	P11633	P11633	Non-histone chromosomal protein 6B	NHP6B	P11633
21_M_UP	+	5.0047e-31	262250000	3.61466	0.00300924	-1.66401	P40345	P40345	Phospholipid:diacylglycerol acyltransferase	LRO1	P40345
21_M_UP	+	0	224100000000	3.62052	0.00297969	-1.66472	P19414	P19414	Aconitate hydratase, mitochondrial	ACO1	P19414
21_M_UP	+	3.0909e-61	2928100000	3.62353	0.00296989	-1.66508	P33759	P33759	37S ribosomal protein S5, mitochondrial	MRPS5	P33759
21_M_UP	+	5.6808e-295	9095600000	3.62526	0.00296893	-1.66529	Q04728	Q04728	Arginine biosynthesis bifunctional protein ArgJ, mitochondrial;Glutamate N-acetyltransferase;Amino-acid acetyltransferase;Arginine biosynthesis bifunctional protein ArgJ alpha chain;Arginine biosynthesis bifunctional protein ArgJ beta chain	ARG7	Q04728
21_G1_UP	+	0	13467000000	3.65301	0.0027954	1.66861	P39683	P39683	Nicotinate phosphoribosyltransferase	NPT1	P39683
21_G1_UP	+	0	324260000000	3.65354	0.00280231	1.66867	P05317	P05317	60S acidic ribosomal protein P0	RPP0	P05317
21_G1_UP	+	4.1806e-08	436670000	3.65392	0.00281023	1.66872	Q06144	Q06144	Protein ORM2	ORM2	Q06144
21_G1_UP	+	1.4655e-213	3597200000	3.67491	0.00268759	1.67119	P40471	P40471	NADPH-dependent 1-acyldihydroxyacetone phosphate reductase	AYR1	P40471
21_G1_UP	+	5.1585e-194	1112000000	3.67914	0.00267149	1.67169	P08679	P08679	Citrate synthase, peroxisomal	CIT2	P08679
21_M_UP	+	1.2664e-72	1316600000	3.68212	0.00266314	-1.67204	Q12287	Q12287	Cytochrome c oxidase copper chaperone	COX17	Q12287
21_G1_UP	+	1.6359e-30	15368000000	3.70375	0.00254326	1.67456	P61830	P61830	Histone H3	HHT1	P61830
21_M_UP	+	0	6236500000	3.72207	0.00244745	-1.67667	P53278	P53278	Uncharacterized protein YGR130C	YGR130C	P53278
21_M_UP	+	5.1328e-71	28460000000	3.72665	0.00243095	-1.67719	P04710	P04710	ADP,ATP carrier protein 1	AAC1	P04710
21_G1_UP	+	1.5209e-157	2560600000	3.73975	0.00236767	1.67869	P32803	P32803	Endosomal protein P24B	EMP24	P32803
21_G1_UP	+	5.86e-261	8671300000	3.74044	0.00237293	1.67876	P38689	P38689	Ribose-phosphate pyrophosphokinase 3	PRS3	P38689
21_M_UP	+	1.2057e-80	1457900000	3.74138	0.00237689	-1.67887	P12611	P12611	Growth regulation protein	WHI2	P12611
21_M_UP	+	3.8453e-28	622480000	3.74438	0.00236958	-1.67921	P13259	P13259	Choline-phosphate cytidylyltransferase	PCT1	P13259
21_G1_UP	+	2.6567e-65	1975000000	3.76012	0.00229408	1.68099	P53600	P53600	Coatomer subunit zeta	RET3	P53600
21_M_UP	+	0	83570000000	3.76545	0.00227489	-1.68159	P07806	P07806	Valine--tRNA ligase, mitochondrial	VAS1	P07806
21_G1_UP	+	0	7231600000	3.76728	0.00227414	1.68179	P53081	P53081	NGG1-interacting factor 3	NIF3	P53081
21_M_UP	+	3.4494e-244	3897300000	3.7701	0.00226824	-1.68211	P32356	P32356	Neutral trehalase	NTH1	P32356
21_G1_UP	+	0	36349000000	3.77319	0.00226098	1.68245	Q12074	Q12074	Spermidine synthase	SPE3	Q12074
21_G1_UP	+	1.1867e-148	807850000	3.77387	0.00226632	1.68253	Q99288	Q99288	Broad-range acid phosphatase DET1	DET1	Q99288
21_G1_UP	+	0	258100000000	3.77802	0.00225364	1.68299	P14126	P14126	60S ribosomal protein L3	RPL3	P14126
21_G1_UP	+	2.2333e-72	2623300000	3.78634	0.00221967	1.68392	P38698	P38698	Exopolyphosphatase	PPX1	P38698
21_M_UP	+	0	14542000000	3.78645	0.00222793	-1.68393	P33416	P33416	Heat shock protein 78, mitochondrial	HSP78	P33416
21_M_UP	+	2.1571e-123	9903600000	3.78679	0.00223507	-1.68397	Q12117	Q12117	Protein MRH1	MRH1	Q12117
21_M_UP	+	0	6686300000	3.79791	0.00218735	-1.6852	P53066	P53066	Ankyrin repeat-containing protein YGL242C		P53066
21_M_UP	+	6.5471e-23	292340000	3.79817	0.00219485	-1.68523	Q08278	Q08278	Mediator of RNA polymerase II transcription subunit 7	MED7	Q08278
21_G1_UP	+	0	142790000000	3.80386	0.00217504	1.68586	P04807	P04807	Hexokinase-2	HXK2	P04807
21_M_UP	+	0	3396700000	3.805	0.00217815	-1.68598	P40477	P40477	Nucleoporin NUP159	NUP159	P40477
21_G1_UP	+	0	12385000000	3.81125	0.00215583	1.68667	P40495	P40495	Homoisocitrate dehydrogenase, mitochondrial	LYS12	P40495
21_M_UP	+	9.5281e-35	3248400000	3.8127	0.00215741	-1.68683	Q08920	Q08920	Nuclear cap-binding protein subunit 2	CBC2	Q08920
21_M_UP	+	2.2394e-17	194370000	3.81479	0.00215592	-1.68706	P33748	P33748	Zinc finger protein MSN2	MSN2	P33748
21_G1_UP	+	0	53406000000	3.82503	0.00211435	1.68817	P31116	P31116	Homoserine dehydrogenase	HOM6	P31116
21_M_UP	+	2.3162e-27	408290000	3.8259	0.0021189	-1.68827	Q08144	Q08144	T-SNARE affecting a late Golgi compartment protein 2	TLG2	Q08144
21_M_UP	+	0	8886500000	3.82629	0.00212581	-1.68831	P32602	P32602	Alpha-soluble NSF attachment protein	SEC17	P32602
21_M_UP	+	2.8101e-169	1784300000	3.83064	0.00211344	-1.68878	P38853	P38853	Kelch repeat-containing protein 1	KEL1	P38853
21_M_UP	+	0	10740000000	3.83107	0.0021202	-1.68883	P27614	P27614	Carboxypeptidase S	CPS1	P27614
21_G1_UP	+	0	186000000000	3.83355	0.00211704	1.6891	P0CX46;P0CX45	P0CX46;P0CX45	60S ribosomal protein L2-B;60S ribosomal protein L2-A	RPL2B;RPL2A	P0CX46
21_M_UP	+	1.2542e-235	3381600000	3.84214	0.00208435	-1.69003	P48415	P48415	COPII coat assembly protein SEC16	SEC16	P48415
21_G1_UP	+	0	307810000000	3.8422	0.00209296	1.69004	P10664	P10664	60S ribosomal protein L4-A	RPL4A	P10664
21_G1_UP	+	0	33286000000	3.847	0.00207879	1.69055	Q07478	Q07478	ATP-dependent RNA helicase SUB2	SUB2	Q07478
21_G1_UP	+	0	23118000000	3.84735	0.00208602	1.69059	Q05016	Q05016	Uncharacterized oxidoreductase YMR226C		Q05016
21_G1_UP	+	0	149100000000	3.85113	0.00207687	1.691	P23301;P19211	P23301	Eukaryotic translation initiation factor 5A-1	HYP2	P23301
21_M_UP	+	1.2427e-31	726940000	3.85525	0.00206616	-1.69144	P40019	P40019	Histone H2A.Z-specific chaperone CHZ1	CHZ1	P40019
21_G1_UP	+	0	20469000000	3.85931	0.00205584	1.69187	P32473	P32473	Pyruvate dehydrogenase E1 component subunit beta, mitochondrial	PDB1	P32473
21_M_UP	+	5.1253e-189	5044300000	3.86601	0.00203321	-1.69259	P47150	P47150	37S ribosomal protein S7, mitochondrial	RSM7	P47150
21_M_UP	+	0	4591700000	3.86941	0.0020262	-1.69295	P32327	P32327	Pyruvate carboxylase 2	PYC2	P32327
21_G1_UP	+	1.6577e-52	2535800000	3.87213	0.00202242	1.69324	P46669	P46669	DNA-directed RNA polymerase I subunit RPA43	RPA43	P46669
21_G1_UP	+	0	23494000000	3.87215	0.00203129	1.69324	Q02326	Q02326	60S ribosomal protein L6-A	RPL6A	Q02326
21_M_UP	+	0	13789000000	3.87543	0.00202495	-1.69359	P07275	P07275	Delta-1-pyrroline-5-carboxylate dehydrogenase, mitochondrial	PUT2	P07275
21_M_UP	+	0	13760000000	3.88382	0.00199506	-1.69448	P04050	P04050	DNA-directed RNA polymerase II subunit RPB1	RPO21	P04050
21_M_UP	+	4.5367e-298	2774800000	3.88911	0.00197975	-1.69504	P34237	P34237	Protein CASP	COY1	P34237
21_G1_UP	+	1.9136e-179	1485500000	3.89568	0.00195881	1.69573	P21268	P21268	Cyclin-dependent kinase inhibitor FAR1	FAR1	P21268
21_M_UP	+	0	34856000000	3.93353	0.00180344	-1.69967	P53141	P53141	Myosin light chain 1	MLC1	P53141
21_M_UP	+	0	2536400000	3.94113	0.00178023	-1.70045	Q04432	Q04432	Probable chaperone protein HSP31	HSP31	Q04432
21_M_UP	+	2.4565e-50	1648500000	3.94795	0.00176048	-1.70115	Q06090	Q06090	54S ribosomal protein L51, mitochondrial	MRPL51	Q06090
21_G1_UP	+	0	38486000000	3.95209	0.0017518	1.70158	P14020	P14020	Dolichol-phosphate mannosyltransferase	DPM1	P14020
21_G1_UP	+	5.9386e-96	2542500000	3.96032	0.00172683	1.70242	P11353	P11353	Coproporphyrinogen-III oxidase	HEM13	P11353
21_G1_UP	+	0	9435000000	3.97186	0.00168932	1.70359	P53615	P53615	Carbonic anhydrase	NCE103	P53615
21_M_UP	+	9.0177e-22	362360000	3.97869	0.00167068	-1.70428	P40022	P40022	Uncharacterized protein YER034W	YER034W	P40022
21_M_UP	+	2.3103e-171	770720000	3.99011	0.00163493	-1.70543	Q12034	Q12034	Protein SLF1	SLF1	Q12034
21_M_UP	+	3.8985e-174	2454800000	3.99476	0.00162512	-1.70589	P25582	P25582	27S pre-rRNA (guanosine(2922)-2-O)-methyltransferase	SPB1	P25582
21_G1_UP	+	6.0527e-177	2243600000	4.01054	0.00157454	1.70746	P38828	P38828	Protein LSM12	LSM12	P38828
21_M_UP	+	0	8760200000	4.02219	0.00154011	-1.70862	P36775	P36775	Lon protease homolog, mitochondrial	PIM1	P36775
21_M_UP	+	1.1446e-148	2207100000	4.02403	0.0015409	-1.7088	P25386	P25386	Intracellular protein transport protein USO1	USO1	P25386
21_M_UP	+	5.9154e-09	898150000	4.02909	0.00153035	-1.7093	P53905	P53905	U6 snRNA-associated Sm-like protein LSm7	LSM7	P53905
21_M_UP	+	1.9834e-26	201630000	4.0302	0.00153379	-1.70941	P40009	P40009	Golgi apyrase	YND1	P40009
21_G1_UP	+	0	23985000000	4.0455	0.00148785	1.7109	P37303	P37303	Low specificity L-threonine aldolase	GLY1	P37303
21_G1_UP	+	6.3508e-88	1284700000	4.05067	0.00147736	1.71141	P53095	P53095	D-serine dehydratase	DSD1	P53095
21_M_UP	+	9.0081e-94	1792800000	4.0561	0.00146612	-1.71194	Q04500	Q04500	U3 small nucleolar RNA-associated protein 14	UTP14	Q04500
21_G1_UP	+	6.2901e-153	4107200000	4.06521	0.00144272	1.71282	P19881	P19881	4-nitrophenylphosphatase	PHO13	P19881
21_G1_UP	+	7.2337e-198	2662600000	4.0937	0.0013645	1.71555	P41543	P41543	Dolichyl-diphosphooligosaccharide--protein glycosyltransferase subunit 1	OST1	P41543
21_M_UP	+	6.3701e-122	1928900000	4.09421	0.00136968	-1.7156	P22579	P22579	Transcriptional regulatory protein SIN3	SIN3	P22579
21_M_UP	+	2.0199e-14	324060000	4.10941	0.00132919	-1.71704	Q6WNK7	Q6WNK7	Protein SUS1	SUS1	Q6WNK7
21_M_UP	+	2.9007e-32	3783600000	4.11702	0.00131266	-1.71776	P47006	P47006	DNA-directed RNA polymerase I subunit RPA34	RPA34	P47006
21_M_UP	+	1.2293e-284	4986500000	4.11793	0.00131652	-1.71784	P07702	P07702	L-aminoadipate-semialdehyde dehydrogenase	LYS2	P07702
21_M_UP	+	0	19429000000	4.11802	0.00132294	-1.71785	P33331	P33331	Nuclear transport factor 2	NTF2	P33331
21_M_UP	+	1.2672e-33	1313600000	4.11818	0.00132921	-1.71787	Q08873	Q08873	Transgelin	SCP1	Q08873
21_M_UP	+	0	17382000000	4.12064	0.00132847	-1.7181	P00812	P00812	Arginase	CAR1	P00812
21_G1_UP	+	0	34469000000	4.12319	0.00132749	1.71834	Q12122	Q12122	Homocitrate synthase, mitochondrial	LYS21	Q12122
21_G1_UP	+	1.3087e-06	82165000	4.12786	0.0013201	1.71877	Q12051	Q12051	Geranylgeranyl pyrophosphate synthase	BTS1	Q12051
21_M_UP	+	0	16492000000	4.13239	0.00131321	-1.7192	Q02725	Q02725	Vacuolar transporter chaperone 3	VTC3	Q02725
21_G1_UP	+	6.3859e-30	317790000	4.14732	0.00127548	1.72059	P38829	P38829	MIP18 family protein YHR122W	YHR122W	P38829
21_M_UP	+	8.5921e-216	7187300000	4.14997	0.00127439	-1.72083	P38999	P38999	Saccharopine dehydrogenase [NADP(+), L-glutamate-forming]	LYS9	P38999
21_G1_UP	+	0	306210000000	4.15704	0.00126045	1.72149	P60010	P60010	Actin	ACT1	P60010
21_G1_UP	+	1.9613e-217	3789300000	4.16217	0.00125227	1.72196	P38694	P38694	Putative aldehyde dehydrogenase-like protein YHR039C	MSC7	P38694
21_M_UP	+	0	11696000000	4.17383	0.00122562	-1.72303	P40327	P40327	26S protease regulatory subunit 4 homolog	RPT2	P40327
21_M_UP	+	3.6963e-136	2528100000	4.17509	0.00122862	-1.72315	Q06704	Q06704	Golgin IMH1	IMH1	Q06704
21_G1_UP	+	0	11414000000	4.18217	0.00121532	1.72379	P21242	P21242	Probable proteasome subunit alpha type-7	PRE10	P21242
21_G1_UP	+	8.2888e-207	51629000000	4.19544	0.00118515	1.725	P48164	P48164	40S ribosomal protein S7-B	RPS7B	P48164
21_M_UP	+	0	8586000000	4.19873	0.00118262	-1.72529	P22768	P22768	Argininosuccinate synthase	ARG1	P22768
21_G1_UP	+	1.5349e-294	17478000000	4.20838	0.00116298	1.72616	P32288	P32288	Glutamine synthetase	GLN1	P32288
21_G1_UP	+	0	37756000000	4.21461	0.00115276	1.72672	P15646	P15646	rRNA 2-O-methyltransferase fibrillarin	NOP1	P15646
21_M_UP	+	0	3781100000	4.22326	0.00113631	-1.7275	Q07807	Q07807	mRNA-binding protein PUF3	PUF3	Q07807
21_M_UP	+	4.6333e-35	354440000	4.23407	0.00111455	-1.72846	Q06169	Q06169	Peroxisomal membrane protein PEX30	PEX30	Q06169
21_M_UP	+	0	9616900000	4.23718	0.00111283	-1.72874	P53912	P53912	Uncharacterized protein YNL134C		P53912
21_M_UP	+	3.0908e-255	1355600000	4.24167	0.00110761	-1.72913	P43597	P43597	Uncharacterized protein YFR016C	YFR016C	P43597
21_M_UP	+	3.1769e-33	342500000	4.24937	0.00109431	-1.72982	P25365	P25365	Putative guanine nucleotide-exchange factor SED4	SED4	P25365
21_M_UP	+	0	3048400000	4.27047	0.00104839	-1.73167	Q00402	Q00402	Nuclear migration protein NUM1	NUM1	Q00402
21_G1_UP	+	7.8195e-79	4050900000	4.27332	0.0010475	1.73191	P32469	P32469	Diphthine synthase	DPH5	P32469
21_M_UP	+	1.3764e-44	2462200000	4.28496	0.00102569	-1.73293	Q06449	Q06449	[PSI+] inducibility protein 3	PIN3	Q06449
21_G1_UP	+	0	21825000000	4.28968	0.00102051	1.73333	P07991	P07991	Ornithine aminotransferase	CAR2	P07991
21_G1_UP	+	5.7362e-33	927140000	4.291	0.00102337	1.73345	D6VTK4	D6VTK4	Pheromone alpha factor receptor	STE2	D6VTK4
21_M_UP	+	0	12834000000	4.32803	0.000945255	-1.73662	P53622	P53622	Coatomer subunit alpha	COP1	P53622
21_G1_UP	+	0	16392000000	4.35475	0.000894101	1.73887	P40893	P40893	Regulation of enolase protein 1	REE1	P40893
21_G1_UP	+	7.8037e-127	34906000000	4.36348	0.000881529	1.7396	P02309	P02309	Histone H4	HHF1	P02309
21_G1_UP	+	0	109580000000	4.36607	0.000881528	1.73981	P34760;Q04120	P34760	Peroxiredoxin TSA1	TSA1	P34760
21_G1_UP	+	5.3175e-101	1578500000	4.36608	0.000886834	1.73981	Q08931	Q08931	Pheromone-regulated membrane protein 3	PRM3	Q08931
21_G1_UP	+	4.3603e-83	1361900000	4.38144	0.000861197	1.74109	P40476	P40476	Pheromone-regulated membrane protein 5	PRM5	P40476
21_G1_UP	+	7.3866e-06	59338000	4.3861	0.000857193	1.74147	P53930	P53930	Protein AF-9 homolog	YAF9	P53930
21_M_UP	+	4.9607e-103	876400000	4.39502	0.000844921	-1.74221	P36123	P36123	SIT4-associating protein SAP190	SAP190	P36123
21_G1_UP	+	0	68061000000	4.40211	0.000836375	1.74279	P49723	P49723	Ribonucleoside-diphosphate reductase small chain 2	RNR4	P49723
21_M_UP	+	2.0106e-173	1004700000	4.40315	0.000839557	-1.74287	P53112	P53112	Peroxisomal membrane protein PEX14	PEX14	P53112
21_M_UP	+	2.5869e-54	1061500000	4.42734	0.000799038	-1.74484	P53064	P53064	RNA polymerase-associated protein RTF1	RTF1	P53064
21_G1_UP	+	0	39448000000	4.43029	0.00079862	1.74508	P05749	P05749	60S ribosomal protein L22-A	RPL22A	P05749
21_M_UP	+	0	11782000000	4.43563	0.000793857	-1.74551	P32457	P32457	Cell division control protein 3	CDC3	P32457
21_G1_UP	+	1.6183e-31	934880000	4.43678	0.000796795	1.7456	P53073	P53073	ER membrane protein complex subunit 4	EMC4	P53073
21_M_UP	+	0	5890800000	4.4406	0.000794883	-1.7459	P11075	P11075	Protein transport protein SEC7	SEC7	P11075
21_G1_UP	+	0	33602000000	4.44061	0.000799997	1.74591	P13188	P13188	Glutamine--tRNA ligase	GLN4	P13188
21_M_UP	+	0	16526000000	4.44769	0.000792165	-1.74647	P53163	P53163	54S ribosomal protein L12, mitochondrial	MNP1	P53163
21_G1_UP	+	2.2137e-232	8396600000	4.45116	0.00079099	1.74675	Q04344	Q04344	Hit family protein 1	HNT1	Q04344
21_G1_UP	+	0	16152000000	4.46398	0.000773035	1.74777	P29509	P29509	Thioredoxin reductase 1	TRR1	P29509
21_M_UP	+	1.6053e-122	1480300000	4.49551	0.000723671	-1.75025	P38272	P38272	SWI5-dependent HO expression protein 3	SHE3	P38272
21_M_UP	+	0	20168000000	4.50197	0.000717737	-1.75076	P32074	P32074	Coatomer subunit gamma	SEC21	P32074
21_G1_UP	+	5.2546e-07	58103000	4.54246	0.000658234	1.75388	P37366	P37366	Cyclin CCL1	CCL1	P37366
21_M_UP	+	1.5799e-109	355620000	4.55798	0.000639417	-1.75506	P08964	P08964	Myosin-1	MYO1	P08964
21_G1_UP	+	7.8895e-185	1358000000	4.55873	0.000642655	1.75512	P38993	P38993	Iron transport multicopper oxidase FET3	FET3	P38993
21_M_UP	+	3.6188e-85	2095400000	4.56082	0.000643951	-1.75527	P13587	P13587	Sodium transport ATPase 1	ENA1	P13587
21_M_UP	+	3.1668e-189	3151500000	4.57538	0.000627017	-1.75637	P42846	P42846	Protein KRI1	KRI1	P42846
21_G1_UP	+	0	44292000000	4.57761	0.000628129	1.75654	P25491	P25491	Mitochondrial protein import protein MAS5	YDJ1	P25491
21_G1_UP	+	1.4781e-23	335820000	4.58686	0.000619196	1.75723	Q02890	Q02890	Peptide-N(4)-(N-acetyl-beta-glucosaminyl)asparagine amidase	PNG1	Q02890
21_G1_UP	+	3.1207e-66	1467400000	4.5905	0.00061836	1.7575	P38344	P38344	Pre-60S factor REI1	REI1	P38344
21_M_UP	+	0	6819200000	4.59281	0.000619437	-1.75767	P14907	P14907	Nucleoporin NSP1	NSP1	P14907
21_G1_UP	+	0	2595800000	4.59326	0.000623209	1.75771	P16370	P16370	DNA-directed RNA polymerase II subunit RPB3	RPB3	P16370
21_M_UP	+	0	8460100000	4.59724	0.000621977	-1.758	P47160	P47160	Epsin-3	ENT3	P47160
21_G1_UP	+	1.9939e-243	1704200000	4.6043	0.000616373	1.75853	P22139	P22139	DNA-directed RNA polymerases I, II, and III subunit RPABC5	RPB10	P22139
21_G1_UP	+	0	17176000000	4.61503	0.000605727	1.75932	Q03161	Q03161	Glucose-6-phosphate 1-epimerase		Q03161
21_G1_UP	+	0	1929700000	4.61997	0.000603275	1.75968	P40150	P40150	Heat shock protein SSB2	SSB2	P40150
21_G1_UP	+	2.087e-116	73481000000	4.64481	0.000573964	1.7615	P04449	P04449	60S ribosomal protein L24-A	RPL24A	P04449
21_G1_UP	+	0	3365800000	4.65021	0.0005711	1.76189	P25045	P25045	Serine palmitoyltransferase 1	LCB1	P25045
21_G1_UP	+	1.2151e-21	429070000	4.65439	0.00056988	1.76219	Q07589	Q07589	Uncharacterized protein YDL144C	YDL144C	Q07589
21_M_UP	+	1.0374e-26	415540000	4.6794	0.000542072	-1.76399	Q06451	Q06451	Polyamine transporter 3	TPO3	Q06451
21_M_UP	+	0	20230000000	4.68193	0.000543033	-1.76417	P38968	P38968	Protein transport protein SEC31	SEC31	P38968
21_G1_UP	+	0	94784000000	4.68268	0.00054627	1.76422	P0CX40;P0CX39	P0CX40;P0CX39	40S ribosomal protein S8-B;40S ribosomal protein S8-A	RPS8B;RPS8A	P0CX40
21_M_UP	+	2.0371e-136	3129000000	4.6859	0.000546432	-1.76445	Q03246	Q03246	37S ribosomal protein S17, mitochondrial	MRPS17	Q03246
21_M_UP	+	3.0493e-68	432480000	4.68849	0.000547433	-1.76464	P38079	P38079	Protein YRO2	YRO2	P38079
21_G1_UP	+	2.0795e-287	208790000000	4.70589	0.000530071	1.76587	P05755	P05755	40S ribosomal protein S9-B	RPS9B	P05755
21_G1_UP	+	7.3517e-147	3931700000	4.70718	0.000532689	1.76596	Q12024	Q12024	Ribosome biogenesis protein YTM1	YTM1	Q12024
21_G1_UP	+	1.3093e-116	1239500000	4.70813	0.000535779	1.76603	Q12525	Q12525	Homocysteine S-methyltransferase 1	MHT1	Q12525
21_G1_UP	+	3.2231e-151	1875800000	4.70963	0.000538241	1.76613	P38234	P38234	Protein RFS1	RFS1	P38234
21_G1_UP	+	0	39576000000	4.7099	0.000542282	1.76615	P18562	P18562	Uracil phosphoribosyltransferase	FUR1	P18562
21_M_UP	+	2.0951e-171	5733700000	4.71259	0.000543341	-1.76634	P53075	P53075	Sensitivity to high expression protein 10	SHE10	P53075
21_G1_UP	+	0	14101000000	4.71276	0.000547627	1.76635	P24783	P24783	ATP-dependent RNA helicase DBP2	DBP2	P24783
21_G1_UP	+	0	22140000000	4.71705	0.000546756	1.76665	Q04067	Q04067	Eukaryotic translation initiation factor 3 subunit G	TIF35	Q04067
21_G1_UP	+	0	5844300000	4.73376	0.000530535	1.76782	P08539	P08539	Guanine nucleotide-binding protein alpha-1 subunit	GPA1	P08539
21_G1_UP	+	0	129120000000	4.74355	0.000523111	1.7685	P38754;P36105	P38754;P36105	60S ribosomal protein L14-B;60S ribosomal protein L14-A	RPL14B;RPL14A	P38754
21_G1_UP	+	4.0361e-280	8372700000	4.74926	0.000520689	1.7689	P53909	P53909	Adenine deaminase	AAH1	P53909
21_M_UP	+	0	10503000000	4.74973	0.000524611	-1.76893	Q12449	Q12449	Hsp90 co-chaperone AHA1	AHA1	Q12449
21_M_UP	+	0	4290600000	4.76046	0.000516261	-1.76967	P38426	P38426	Trehalose synthase complex regulatory subunit TPS3	TPS3	P38426
21_G1_UP	+	1.6749e-184	16943000000	4.77127	0.000507989	1.77041	P49435	P49435	Adenine phosphoribosyltransferase 1	APT1	P49435
21_G1_UP	+	7.3477e-119	2329900000	4.80211	0.00047735	1.7725	P38203	P38203	U6 snRNA-associated Sm-like protein LSm2	LSM2	P38203
21_G1_UP	+	3.7119e-245	83043000000	4.8134	0.000469256	1.77325	P04456	P04456	60S ribosomal protein L25	RPL25	P04456
21_G1_UP	+	4.5786e-207	7081500000	4.81867	0.00046777	1.77361	P38777	P38777	Family of serine hydrolases 1	FSH1	P38777
21_G1_UP	+	2.499e-189	1171800000	4.86228	0.000426932	1.77649	Q02753	Q02753	60S ribosomal protein L21-A	RPL21A	Q02753
21_M_UP	+	0	11930000000	4.86911	0.000424123	-1.77693	P30822	P30822	Exportin-1	CRM1	P30822
21_G1_UP	+	0	45941000000	4.8723	0.000424919	1.77714	P04801	P04801	Threonine--tRNA ligase, cytoplasmic	THS1	P04801
21_M_UP	+	2.1638e-06	398150000	4.91151	0.00039186	-1.77966	Q3E830	Q3E830	Uncharacterized protein YCR075W-A	YCR075W-A	Q3E830
21_G1_UP	+	1.1532e-249	3351500000	4.9242	0.000384167	1.78047	Q03774	Q03774	tRNA (guanine-N(7)-)-methyltransferase subunit TRM82	TRM82	Q03774
21_G1_UP	+	9.3087e-11	401660000	4.92978	0.000382873	1.78083	P49018	P49018	GPI-anchor transamidase	GPI8	P49018
21_G1_UP	+	0	13631000000	4.95382	0.000365738	1.78234	Q04491	Q04491	Protein transport protein SEC13	SEC13	Q04491
21_G1_UP	+	0	112570000000	4.95505	0.00036825	1.78241	P0CX44;P0CX43	P0CX44;P0CX43	60S ribosomal protein L1-B;60S ribosomal protein L1-A	RPL1B;RPL1A	P0CX44
21_G1_UP	+	0	57369000000	4.97518	0.000355012	1.78366	P25087	P25087	Sterol 24-C-methyltransferase	ERG6	P25087
21_G1_UP	+	1.3887e-49	602740000	4.98023	0.000354387	1.78398	Q12498	Q12498	Pheromone-regulated membrane protein 4	PRM4	Q12498
21_M_UP	+	2.608e-101	2277000000	4.98501	0.000354013	-1.78427	P38623	P38623	Serine/threonine-protein kinase RCK2	RCK2	P38623
21_G1_UP	+	0	27733000000	5.0108	0.000336967	1.78585	P12385	P12385	Eukaryotic peptide chain release factor subunit 1	SUP45	P12385
21_M_UP	+	3.5365e-199	9504400000	5.0135	0.000338295	-1.78601	P42940	P42940	Probable electron transfer flavoprotein subunit beta	CIR1	P42940
21_M_UP	+	2.0609e-179	9026500000	5.01724	0.000338857	-1.78624	P25039	P25039	Elongation factor G, mitochondrial	MEF1	P25039
21_G1_UP	+	0	82585000000	5.04496	0.000321216	1.78791	P19358	P19358	S-adenosylmethionine synthase 2	SAM2	P19358
21_M_UP	+	0	8522400000	5.05071	0.000320325	-1.78825	P43593	P43593	Ubiquitin carboxyl-terminal hydrolase 6	UBP6	P43593
21_G1_UP	+	2.4091e-81	1853300000	5.06726	0.000311629	1.78924	P53251	P53251	Ribosome biogenesis protein SLX9	SLX9	P53251
21_M_UP	+	5.7656e-276	7140200000	5.10097	0.000291459	-1.79121	P25623	P25623	Suppressor of yeast profilin deletion	SYP1	P25623
21_G1_UP	+	1.258e-178	9540100000	5.10549	0.000291574	1.79148	P33201	P33201	mRNA turnover protein 4	MRT4	P33201
21_M_UP	+	0	77008000000	5.11028	0.000291543	-1.79176	P11154	P11154	Pyruvate carboxylase 1	PYC1	P11154
21_G1_UP	+	1.3867e-119	3133700000	5.11722	0.000290108	1.79216	P36017;P36019	P36017	Vacuolar protein sorting-associated protein 21	VPS21	P36017
21_M_UP	+	1.963e-42	1320800000	5.11749	0.000293189	-1.79217	P26754	P26754	Replication factor A protein 2	RFA2	P26754
21_G1_UP	+	5.3882e-119	1023600000	5.1184	0.0002959	1.79223	Q12040	Q12040	Broad-specificity phosphatase YOR283W	YOR283W	Q12040
21_G1_UP	+	8.3818e-12	171520000	5.13662	0.000287003	1.79327	Q12326	Q12326	Phosphoglycerate mutase 3	GPM3	Q12326
21_G1_UP	+	9.0673e-58	4818600000	5.15425	0.000278789	1.79428	P53507	P53507	Mitochondrial import receptor subunit TOM7	TOM7	P53507
21_G1_UP	+	4.5875e-20	224540000	5.18013	0.000265753	1.79574	Q03786	Q03786	Probable gluconokinase	YDR248C	Q03786
21_G1_UP	+	0	42688000000	5.1828	0.00026727	1.79589	P50094	P50094	Inosine-5-monophosphate dehydrogenase 4	IMD4	P50094
21_M_UP	+	0	44513000000	5.18373	0.000269907	-1.79594	P07264	P07264	3-isopropylmalate dehydratase	LEU1	P07264
21_M_UP	+	0	4183200000	5.20328	0.000261175	-1.79703	P24031	P24031	Constitutive acid phosphatase	PHO3	P24031
21_M_UP	+	3.8626e-40	1351700000	5.21071	0.000259914	-1.79744	Q00873	Q00873	Cytochrome c1 heme lyase	CYT2	Q00873
21_G1_UP	+	5.9708e-59	432370000	5.25952	0.00023519	1.8001	P12866	P12866	Alpha-factor-transporting ATPase	STE6	P12866
21_M_UP	+	0	6790200000	5.28012	0.000227135	-1.80121	P21734	P21734	Ubiquitin-conjugating enzyme E2 1	UBC1	P21734
21_G1_UP	+	0	12457000000	5.2858	0.000227054	1.80151	P28274	P28274	CTP synthase 1	URA7	P28274
21_M_UP	+	2.6959e-46	466770000	5.30052	0.000222338	-1.80229	Q12343	Q12343	Mediator of RNA polymerase II transcription subunit 4	MED4	Q12343
21_G1_UP	+	9.5412e-07	267630000	5.33558	0.000207795	1.80413	P53157	P53157	Mitochondrial pyruvate carrier 1	FMP37	P53157
21_M_UP	+	9.9658e-112	3708100000	5.33821	0.000209294	-1.80427	P53839	P53839	Glyoxylate reductase 1	GOR1	P53839
21_G1_UP	+	0	197040000000	5.34104	0.000210743	1.80442	P10081	P10081	ATP-dependent RNA helicase eIF4A	TIF1	P10081
21_G1_UP	+	0	12800000000	5.3734	0.000198292	1.80608	Q12464	Q12464	RuvB-like protein 2	RVB2	Q12464
21_M_UP	+	0	11662000000	5.38185	0.000197171	-1.80651	P80210	P80210	Adenylosuccinate synthetase	ADE12	P80210
21_G1_UP	+	0	113170000000	5.3895	0.000196458	1.8069	P0CX24;P0CX23	P0CX24;P0CX23	60S ribosomal protein L20-B;60S ribosomal protein L20-A	RPL20B;RPL20A	P0CX24
21_G1_UP	+	0	28583000000	5.44862	0.000173903	1.80986	P32497	P32497	Eukaryotic translation initiation factor 3 subunit C	NIP1	P32497
21_G1_UP	+	1.4049e-20	122830000	5.45168	0.000175185	1.81001	P49686	P49686	Nucleoporin NUP42	NUP42	P49686
21_M_UP	+	0	38182000000	5.45689	0.000175642	-1.81026	P21576	P21576	Vacuolar protein sorting-associated protein 1	VPS1	P21576
21_G1_UP	+	0	262010000000	5.47207	0.00017214	1.811	P05750	P05750	40S ribosomal protein S3	RPS3	P05750
21_G1_UP	+	5.8509e-44	818410000	5.47348	0.00017418	1.81107	P38331	P38331	HD domain-containing protein YBR242W		P38331
21_G1_UP	+	0	1057500000	5.50596	0.000164116	1.81264	P19146	P19146	ADP-ribosylation factor 2	ARF2	P19146
21_G1_UP	+	2.2977e-205	4789400000	5.52169	0.00016075	1.81339	P11972	P11972	Protein SST2	SST2	P11972
21_M_UP	+	1.4187e-158	5915000000	5.59095	0.00013923	-1.81664	P00431	P00431	Cytochrome c peroxidase, mitochondrial	CCP1	P00431
21_G1_UP	+	2.7568e-163	6528000000	5.596	0.00013984	1.81687	Q12189	Q12189	Ribose-5-phosphate isomerase	RKI1	Q12189
21_G1_UP	+	1.6778e-99	25027000000	5.59864	0.000141273	1.81699	P49167	P49167	60S ribosomal protein L38	RPL38	P49167
21_G1_UP	+	6.0372e-05	245560000	5.63364	0.000132507	1.81858	P41913	P41913	Protein GDS1	GDS1	P41913
21_G1_UP	+	2.2297e-15	334510000	5.67255	0.000123204	1.82032	P36057	P36057	Signal recognition particle receptor subunit beta	SRP102	P36057
21_G1_UP	+	0	253220000000	5.69746	0.000118341	1.82142	P0CX52;P0CX51	P0CX52;P0CX51	40S ribosomal protein S16-B;40S ribosomal protein S16-A	RPS16B;RPS16A	P0CX52
21_M_UP	+	3.7391e-138	5963900000	5.71011	0.000116962	-1.82197	P38616	P38616	Protein YGP1	YGP1	P38616
21_G1_UP	+	0	1355000000	5.75239	0.000108005	1.82379	O13516	O13516	40S ribosomal protein S9-A	RPS9A	O13516
21_M_UP	+	7.8102e-128	916940000	5.75856	0.000108419	-1.82405	Q08581	Q08581	Kinetochore protein SLK19	SLK19	Q08581
21_M_UP	+	0	8068000000	5.79277	0.000102061	-1.82549	P32521	P32521	Actin cytoskeleton-regulatory complex protein PAN1	PAN1	P32521
21_M_UP	+	0	43545000000	5.81613	9.85e-05	-1.82646	Q03690	Q03690	Clustered mitochondria protein 1	CLU1	Q03690
21_G1_UP	+	1.4363e-30	101640000	5.84437	9.41e-05	1.82762	P32639	P32639	Pre-mRNA-splicing helicase BRR2	BRR2	P32639
21_G1_UP	+	0	54053000000	5.87155	9.01e-05	1.82873	P46784	P46784	40S ribosomal protein S10-B	RPS10B	P46784
21_G1_UP	+	2.5874e-28	553670000	5.91912	8.24e-05	1.83062	P38224	P38224	Factor-induced gene 1 protein	FIG1	P38224
21_M_UP	+	0	13421000000	5.97944	7.32e-05	-1.83296	P33299	P33299	26S protease regulatory subunit 7 homolog	RPT1	P33299
21_G1_UP	+	0	258800000000	5.99639	7.18e-05	1.83361	P0CX36;P0CX35	P0CX36;P0CX35	40S ribosomal protein S4-B;40S ribosomal protein S4-A	RPS4B;RPS4A	P0CX36
21_G1_UP	+	4.744e-92	427930000	6.02324	6.9e-05	1.83462	P17119	P17119	Kinesin-like protein KAR3	KAR3	P17119
21_G1_UP	+	2.0631e-10	237520000	6.03413	6.87e-05	1.83503	Q06835	Q06835	Pre-mRNA-splicing factor RDS3	RDS3	Q06835
21_M_UP	+	1.5378e-48	1170100000	6.04025	6.93e-05	-1.83526	P00045	P00045	Cytochrome c iso-2	CYC7	P00045
21_M_UP	+	3.2932e-41	2968000000	6.04422	7.02e-05	-1.8354	P38175	P38175	37S ribosomal protein MRP21, mitochondrial	MRP21	P38175
21_G1_UP	+	0	5105100000	6.05953	6.93e-05	1.83597	Q7LHG5;Q99315;Q99219;Q12173	Q7LHG5;Q99315;Q99219;Q12173	Transposon Ty3-I Gag-Pol polyprotein;Capsid protein;Spacer peptide p3;Nucleocapsid protein p11;Ty3 protease;Spacer peptide J;Reverse transcriptase/ribonuclease H;Integrase p52;Integrase p49;Transposon Ty3-G Gag-Pol polyprotein;Capsid protein;Spacer peptide p3;Nucleocapsid protein p11;Ty3 protease;Spacer peptide J;Reverse transcriptase/ribonuclease H;Integrase p61;Integrase p58;Transposon Ty3-I Ga…	TY3B-I;TY3B-G;TY3A-I;TY3A-G	Q7LHG5
21_M_UP	+	1.8527e-260	5032300000	6.10641	6.37e-05	-1.83768	P57744	P57744	Mitochondrial import inner membrane translocase subunit TIM8	TIM8	P57744
21_M_UP	+	0	6545300000	6.12457	6.26e-05	-1.83833	Q08193	Q08193	1,3-beta-glucanosyltransferase GAS5	GAS5	Q08193
21_G1_UP	+	0	12078000000	6.13215	6.31e-05	1.8386	P38791	P38791	Deoxyhypusine synthase	DYS1	P38791
21_M_UP	+	1.6477e-162	4253700000	6.13848	6.38e-05	-1.83882	P32499	P32499	Nucleoporin NUP2	NUP2	P32499
21_G1_UP	+	3.665e-52	170100000	6.17942	5.95e-05	1.84026	Q03920	Q03920	eRF1 methyltransferase catalytic subunit MTQ2	MTQ2	Q03920
21_M_UP	+	0	12013000000	6.27171	4.94e-05	-1.84341	P43585	P43585	Vacuolar transporter chaperone 2	VTC2	P43585
21_M_UP	+	1.3614e-30	1253100000	6.34469	4.42e-05	-1.8458	P38068	P38068	Monothiol glutaredoxin-7	GRX7	P38068
21_M_UP	+	1.3105e-48	1576900000	6.42204	3.81e-05	-1.84824	P53192	P53192	Golgi to ER traffic protein 1	GET1	P53192
21_G1_UP	+	0	81034000000	6.43661	3.79e-05	1.84869	P41940	P41940	Mannose-1-phosphate guanyltransferase	PSA1	P41940
21_G1_UP	+	0	73583000000	6.46878	3.63e-05	1.84968	P06634	P06634	ATP-dependent RNA helicase DED1	DED1	P06634
21_M_UP	+	0	12737000000	6.52028	3.33e-05	-1.85122	Q05050	Q05050	Eisosome protein 1	EIS1	Q05050
21_G1_UP	+	0	125990000000	6.52163	3.43e-05	1.85126	P46990	P46990	60S ribosomal protein L17-B	RPL17B	P46990
21_M_UP	+	1.5297e-11	958740000	6.54435	3.37e-05	-1.85193	P52871	P52871	Protein transport protein SBH2	SBH2	P52871
21_M_UP	+	0	49421000000	6.60226	3.05e-05	-1.85361	P03965	P03965	Carbamoyl-phosphate synthase arginine-specific large chain	CPA2	P03965
21_M_UP	+	4.192e-164	2545900000	6.64903	2.84e-05	-1.85493	P40563	P40563	Altered inheritance of mitochondria protein 21	AIM21	P40563
21_G1_UP	+	0	267920000000	6.68956	2.69e-05	1.85605	P41805	P41805	60S ribosomal protein L10	RPL10	P41805
21_M_UP	+	2.7328e-43	6966400000	6.69046	2.79e-05	-1.85607	P32478;Q03178;P46999	P32478;Q03178	Cell wall mannoprotein HSP150;Cell wall mannoprotein PIR1	HSP150;PIR1	P32478
21_G1_UP	+	3.4183e-91	1838700000	6.7164	2.74e-05	1.85677	P46993	P46993	Protein ASG7	ASG7	P46993
21_G1_UP	+	1.7019e-58	1034900000	6.80952	2.31e-05	1.85924	P11710	P11710	Nuclear fusion protein FUS1	FUS1	P11710
21_M_UP	+	8.9969e-55	3907400000	6.91226	1.9e-05	-1.86183	Q06833	Q06833	Uncharacterized PH domain-containing protein YPR091C	YPR091C	Q06833
21_M_UP	+	3.0987e-29	537350000	7.02495	1.54e-05	-1.86454	Q96VH4	Q96VH4	Putative nitroreductase HBN1	HBN1	Q96VH4
21_G1_UP	+	1.068e-18	144100000	7.10018	1.36e-05	1.86626	P25583	P25583	Karyogamy protein KAR4	KAR4	P25583
21_G1_UP	+	2.4594e-06	178280000	7.33226	8.38e-06	1.87123	P53725	P53725	M-phase phosphoprotein 6 homolog	MPP6	P53725
21_M_UP	+	0	4565800000	7.33941	8.7e-06	-1.87137	Q07362	Q07362	Protein PBP4	PBP4	Q07362
21_M_UP	+	3.1272e-197	12456000000	7.51058	6.21e-06	-1.87469	P38693;P35842	P38693;P35842	Acid phosphatase PHO12;Acid phosphatase PHO11	PHO12;PHO11	P38693
21_G1_UP	+	4.0379e-19	252710000	7.5121	6.57e-06	1.87472	P34219	P34219	Transcriptional regulatory protein TOD6	TOD6	P34219
21_M_UP	+	1.3005e-202	2207400000	7.70798	4.47e-06	-1.8782	Q02455	Q02455	Protein MLP1	MLP1	Q02455
21_G1_UP	+	0	165610000000	7.81613	3.73e-06	1.88	P38011	P38011	Guanine nucleotide-binding protein subunit beta-like protein	ASC1	P38011
21_M_UP	+	3.4842e-66	252640000	7.84662	3.75e-06	-1.88049	P24869	P24869	G2/mitotic-specific cyclin-2	CLB2	P24869
21_G1_UP	+	3.8024e-14	190920000	7.9501	3.2e-06	1.88209	P48412	P48412	Nonsense-mediated mRNA decay protein 3	UPF3	P48412
21_M_UP	+	1.961e-184	8156200000	7.95297	3.46e-06	-1.88214	P34227	P34227	Mitochondrial peroxiredoxin PRX1	PRX1	P34227
21_G1_UP	+	1.1987e-28	376470000	7.97263	3.64e-06	1.88243	P53110	P53110	Uncharacterized protein YGL159W		P53110
21_M_UP	+	0	9102400000	8.06931	3.24e-06	-1.88385	P00815	P00815	Histidine biosynthesis trifunctional protein;Phosphoribosyl-AMP cyclohydrolase;Phosphoribosyl-ATP pyrophosphohydrolase;Histidinol dehydrogenase	HIS4	P00815
21_G1_UP	+	0	20127000000	8.28542	2.22e-06	1.8868	P40024	P40024	ABC transporter ATP-binding protein ARB1	ARB1	P40024
21_G1_UP	+	2.5752e-06	255050000	8.62863	1.15e-06	1.89092	P54999	P54999	Small nuclear ribonucleoprotein F	SMX3	P54999
21_G1_UP	+	4.0831e-33	871440000	8.91335	6.96e-07	1.89387	P38041	P38041	Protein BOB1	BOI1	P38041
21_M_UP	+	1.6106e-31	200110000	9.01574	6.6e-07	-1.89484	P54785	P54785	Transcriptional activator/repressor MOT3	MOT3	P54785
21_G1_UP	+	2.5728e-10	46338000	9.08433	7.04e-07	1.89547	P08432	P08432	Ornithine decarboxylase	SPE1	P08432
21_G1_UP	+	1.1969e-06	131390000	9.17639	7.59e-07	1.89628	Q08749	Q08749	Mitochondrial import inner membrane translocase subunit TIM18	TIM18	Q08749
21_M_UP	+	0	10244000000	9.42357	6.45e-07	-1.89828	P53297	P53297	PAB1-binding protein 1	PBP1	P53297
21_G1_UP	+	7.8709e-62	724810000	10.5491	9.66e-08	1.905	P38690	P38690	Uncharacterized protein YHR033W	YHR033W	P38690
